# Supplementary material for: Genetic Association of CHRNB3 and CHRNA6 Gene Polymorphisms with Nicotine Dependence Syndrome Scale in Korean Population
Source: PubMed Central journal article supplement — Psychiatry Investig. 2014 Jul 21;11(3):307–12. doi: 10.4306/pi.2014.11.3.307 (PMC4124190; doi:10.4306/pi.2014.11.3.307), 2014-07-21
Supplement: pi-11-307-s001.pdf [file pi-11-307-s001.pdf]

**Supplementary Table 1.** Probe information

| Loci              |         | Assay-on-demand ID or sequence |
|-------------------|---------|--------------------------------|
| <i>rs13280604</i> |         | C___272767_10                  |
| <i>rs16891561</i> | Forward | CAATTATGTCCCTGGGGTTG           |
|                   | Reverse | AGCACATTCCATGGAGGAAG           |
|                   | VIC     | TACCACCACTAAA                  |
|                   | FAM     | ACCACCATTAAAC                  |
| <i>rs4954</i>     |         | C__12110132_10                 |
| <i>rs9298628</i>  |         | C___9179070_20                 |
| <i>rs16891604</i> |         | C__33888459_10                 |
| <i>rs10109040</i> | Forward | CCATGTCAGGGGGTTTCTAA           |
|                   | Reverse | AGGGTTTCACCATGTTGCTC           |
|                   | VIC     | AGAACTCAAGAAAAG                |
|                   | FAM     | GAACTGAAGAAAAGA                |
