# Supplementary material for: Genetic Association of CHRNB3 and CHRNA6 Gene Polymorphisms with Nicotine Dependence Syndrome Scale in Korean Population
Source: PubMed Central journal article supplement — Psychiatry Investig. 2014 Jul 21;11(3):307–12. doi: 10.4306/pi.2014.11.3.307 (PMC4124190; doi:10.4306/pi.2014.11.3.307), 2014-07-21
Supplement: pi-11-307-s002.pdf [file pi-11-307-s002.pdf]

**Supplementary Table 2.** Allele frequency of *CHRNA3* and *CHRNA6* polymorphisms in Korean subjects

| Gene          | Loci              | Position | Allele | Genotype distribution |     |     | MAF   | Heterozygosity | HWE   |        |            |
|---------------|-------------------|----------|--------|-----------------------|-----|-----|-------|----------------|-------|--------|------------|
|               |                   |          |        | C/C                   | C/R | R/R |       |                | All   | Smoker | Non-smoker |
| <i>CHRNA3</i> | <i>rs13280604</i> | Intron1  | A>G    | 387                   | 164 | 25  | 0.186 | 0.303          | 0.158 | 0.727  | 0.094      |
|               | <i>rs16891561</i> | Intron3  | C>T    | 389                   | 163 | 24  | 0.183 | 0.299          | 0.193 | 0.679  | 0.145      |
|               | <i>rs4954</i>     | Intron5  | A>G    | 446                   | 117 | 13  | 0.124 | 0.217          | 0.114 | 0.275  | 0.275      |
| <i>CHRNA6</i> | <i>rs9298628</i>  | 3'       | C>T    | 367                   | 184 | 25  | 0.203 | 0.324          | 0.751 | 0.893  | 0.563      |
|               | <i>rs16891604</i> | Intron2  | C>A    | 361                   | 195 | 19  | 0.203 | 0.323          | 0.235 | 0.283  | 0.524      |
|               | <i>rs10109040</i> | 5'       | C>G    | 378                   | 174 | 24  | 0.193 | 0.311          | 0.485 | 0.549  | 0.748      |

C/C, C/R, and R/R represent major homozygotes, heterozygotes, and minor homozygotes, respectively. CHRN: cholinergic nicotinic receptor, MAF: minor allele frequency, HWE: Hardy Weinberg Equilibrium
