# Supplementary material for: Genetic Association of CHRNB3 and CHRNA6 Gene Polymorphisms with Nicotine Dependence Syndrome Scale in Korean Population
Source: PubMed Central journal article supplement — Psychiatry Investig. 2014 Jul 21;11(3):307–12. doi: 10.4306/pi.2014.11.3.307 (PMC4124190; doi:10.4306/pi.2014.11.3.307), 2014-07-21
Supplement: pi-11-307-s003.pdf [file pi-11-307-s003.pdf]

**Supplementary Table 3.** Regression analyses of *CHRNA3* and *CHRNA6* polymorphisms with NDSSF2, NDSSF3, NDSSF4 and NDSSF5 in smokers

| Phenotype         | Gene             | Loci              | All               |                 |                 |                 |                 |                 | Severe ND      |                |                 |                 |                |                | Mild ND |     |     |   |  |  |
|-------------------|------------------|-------------------|-------------------|-----------------|-----------------|-----------------|-----------------|-----------------|----------------|----------------|-----------------|-----------------|----------------|----------------|---------|-----|-----|---|--|--|
|                   |                  |                   | C/C               | C/R             | R/R             | P               | C/C             | C/R             | R/R            | P              | C/C             | C/R             | R/R            | P              | C/C     | C/R | R/R | P |  |  |
| NDSSF2            | <i>CHRNA3</i>    | <i>rs13280604</i> | 234 (6.06±3.06)   | 94 (5.45±2.43)  | 12 (5.83±3.46)  | 0.11            | 123 (6.44±3.28) | 49 (6.27±2.45)  | 8 (5.63±3.50)  | 0.46           | 111 (5.64±2.76) | 45 (4.56±2.08)  | 4 (6.25±3.86)  | 0.10           |         |     |     |   |  |  |
|                   |                  | <i>rs16891561</i> | 235 (6.06±3.06)   | 93 (5.44±2.44)  | 12 (5.83±3.46)  | 0.11            | 124 (6.44±3.27) | 48 (6.27±2.47)  | 8 (5.63±3.50)  | 0.47           | 111 (5.64±2.76) | 45 (4.56±2.08)  | 4 (6.25±3.86)  | 0.10           |         |     |     |   |  |  |
|                   |                  | <i>rs4954</i>     | 266 (5.99±2.98)   | 67 (5.48±2.57)  | 7 (5.71±3.77)   | 0.24            | 144 (6.35±3.14) | 30 (6.47±2.60)  | 6 (5.83±4.12)  | 0.89           | 122 (5.56±2.73) | 37 (4.68±2.29)  | 1 (5.00)       | 0.08           |         |     |     |   |  |  |
|                   | <i>CHRNA6</i>    | <i>rs9298628</i>  | 223 (6.00±2.99)   | 105 (5.70±2.79) | 12 (5.33±2.87)  | 0.18            | 115 (6.30±3.15) | 56 (6.57±2.92)  | 9 (5.67±3.28)  | 0.96           | 108 (5.67±2.78) | 49 (4.71±2.30)  | 3 (4.33±0.58)  | 0.03           |         |     |     |   |  |  |
|                   |                  | <i>rs16891604</i> | 202 (5.76±2.81)   | 124 (6.04±3.01) | 13 (6.38±3.86)  | 0.33            | 103 (6.20±2.99) | 72 (6.53±3.12)  | 5 (7.00±4.53)  | 0.42           | 99 (5.29±2.55)  | 52 (5.37±2.72)  | 8 (6.00±3.66)  | 0.58           |         |     |     |   |  |  |
|                   |                  | <i>rs10109040</i> | 229 (5.99±2.97)   | 98 (5.66±2.81)  | 13 (5.69±3.04)  | 0.27            | 119 (6.30±3.13) | 51 (6.53±2.94)  | 10 (6.10±3.38) | 0.90           | 110 (5.65±2.76) | 47 (4.72±2.35)  | 3 (4.33±0.58)  | 0.04           |         |     |     |   |  |  |
|                   | NDSSF3           | <i>CHRNA3</i>     | <i>ht1</i>        | 65 (5.97±3.02)  | 152 (5.88±3.01) | 123 (5.84±2.77) | 0.99            | 40 (6.28±3.00)  | 78 (6.72±3.25) | 62 (5.95±2.88) | 0.51            | 25 (5.48±3.06)  | 74 (5.00±2.46) | 61 (5.72±2.68) | 0.42    |     |     |   |  |  |
|                   |                  |                   | <i>rs13280604</i> | 237 (6.39±2.10) | 96 (6.46±2.05)  | 12 (6.50±1.51)  | 0.76            | 122 (6.16±2.21) | 49 (6.00±2.13) | 8 (6.88±1.55)  | 0.74            | 115 (6.63±1.96) | 47 (6.94±1.86) | 4 (5.75±1.26)  | 0.89    |     |     |   |  |  |
|                   |                  |                   | <i>rs16891561</i> | 238 (6.38±2.10) | 95 (6.48±2.04)  | 12 (6.50±1.51)  | 0.68            | 123 (6.15±2.21) | 48 (6.04±2.13) | 8 (6.88±1.55)  | 0.65            | 115 (6.63±1.96) | 47 (6.94±1.86) | 4 (5.75±1.26)  | 0.89    |     |     |   |  |  |
|                   |                  | <i>CHRNA6</i>     | <i>rs4954</i>     | 269 (6.40±2.10) | 69 (6.43±1.97)  | 7 (6.57±1.99)   | 0.92            | 143 (6.16±2.20) | 30 (5.93±2.03) | 6 (7.00±1.79)  | 0.76            | 126 (6.67±1.94) | 39 (6.82±1.86) | 1 (4.00)       | 0.84    |     |     |   |  |  |
| <i>rs9298628</i>  |                  |                   | 225 (6.37±2.10)   | 107 (6.50±2.05) | 13 (6.38±1.66)  | 0.69            | 114 (6.14±2.23) | 56 (6.04±2.11)  | 9 (7.00±1.50)  | 0.61           | 111 (6.61±1.94) | 51 (7.00±1.88)  | 4 (5.00±1.15)  | 0.99           |         |     |     |   |  |  |
| <i>rs16891604</i> |                  |                   | 204 (6.38±2.16)   | 127 (6.41±1.92) | 13 (6.85±2.15)  | 0.55            | 102 (6.03±2.21) | 72 (6.24±2.11)  | 5 (7.40±1.52)  | 0.21           | 102 (6.74±2.05) | 55 (6.64±1.61)  | 8 (6.50±2.51)  | 0.67           |         |     |     |   |  |  |
| NDSSF4            |                  | <i>CHRNA3</i>     | <i>rs10109040</i> | 231 (6.38±2.10) | 100 (6.47±2.06) | 14 (6.50±1.65)  | 0.69            | 118 (6.14±2.22) | 51 (6.00±2.12) | 10 (7.10±1.45) | 0.52            | 113 (6.64±1.93) | 49 (6.96±1.89) | 4 (5.00±1.15)  | 0.84    |     |     |   |  |  |
|                   |                  |                   | <i>ht1</i>        | 67 (6.18±1.91)  | 155 (6.74±1.97) | 123 (6.13±2.22) | 0.44            | 40 (6.20±1.98)  | 78 (6.45±2.11) | 61 (5.74±2.31) | 0.18            | 27 (6.15±1.83)  | 77 (7.03±1.78) | 62 (6.52±2.07) | 0.73    |     |     |   |  |  |
|                   |                  |                   | <i>rs13280604</i> | 237 (5.52±2.27) | 95 (5.45±2.28)  | 12 (5.75±1.91)  | 0.54            | 122 (5.98±2.20) | 49 (6.22±2.34) | 8 (5.50±2.07)  | 0.80            | 115 (5.03±2.25) | 46 (4.63±1.91) | 4 (6.25±1.71)  | 0.58    |     |     |   |  |  |
|                   |                  | <i>CHRNA6</i>     | <i>rs16891561</i> | 238 (5.52±2.26) | 94 (5.45±2.29)  | 12 (5.75±1.91)  | 0.54            | 123 (5.98±2.19) | 48 (6.23±2.36) | 8 (5.50±2.07)  | 0.79            | 115 (5.03±2.25) | 46 (4.63±1.91) | 4 (6.25±1.71)  | 0.58    |     |     |   |  |  |
|                   | <i>rs4954</i>    |                   | 269 (5.45±2.25)   | 68 (5.74±2.26)  | 7 (5.71±2.29)   | 0.41            | 143 (5.88±2.19) | 30 (6.83±2.23)  | 6 (5.50±2.43)  | 0.25           | 126 (4.95±2.23) | 38 (4.87±1.91)  | 1 (7.00)       | 0.96           |         |     |     |   |  |  |
|                   | <i>rs9298628</i> |                   | 225 (5.52±2.27)   | 106 (5.44±2.28) | 13 (5.77±1.88)  | 0.52            | 114 (5.96±2.23) | 56 (6.27±2.27)  | 9 (5.44±1.94)  | 0.97           | 111 (5.08±2.23) | 50 (4.52±1.93)  | 4 (6.50±1.73)  | 0.35           |         |     |     |   |  |  |
|                   | NDSSF5           | <i>CHRNA3</i>     | <i>rs16891604</i> | 203 (5.61±2.30) | 127 (5.43±2.21) | 13 (4.92±2.02)  | 0.12            | 102 (6.24±2.28) | 72 (5.71±2.18) | 5 (6.40±1.14)  | 0.13            | 101 (4.97±2.15) | 55 (5.05±2.21) | 8 (4.00±1.93)  | 0.54    |     |     |   |  |  |
|                   |                  |                   | <i>rs10109040</i> | 231 (5.53±2.28) | 99 (5.44±2.26)  | 14 (5.64±1.86)  | 0.54            | 118 (5.98±2.25) | 51 (6.27±2.22) | 10 (5.30±1.89) | 0.82            | 113 (5.05±2.22) | 48 (4.56±1.96) | 4 (6.50±1.73)  | 0.50    |     |     |   |  |  |
|                   |                  |                   | <i>ht1</i>        | 67 (5.43±1.95)  | 154 (5.40±2.36) | 123 (5.68±2.28) | 0.08            | 40 (5.83±1.89)  | 78 (6.00±2.36) | 61 (6.20±2.26) | 0.21            | 27 (4.85±1.92)  | 76 (4.79±2.21) | 62 (5.18±2.19) | 0.26    |     |     |   |  |  |
|                   |                  | <i>CHRNA6</i>     | <i>rs13280604</i> | 236 (5.95±2.05) | 95 (6.02±1.97)  | 12 (6.00±2.09)  | 0.80            | 122 (6.41±1.94) | 49 (6.57±2.03) | 8 (7.00±1.60)  | 0.39            | 114 (5.46±2.05) | 46 (5.43±1.73) | 4 (4.00±1.41)  | 0.54    |     |     |   |  |  |
| <i>rs16891561</i> |                  |                   | 237 (5.96±2.05)   | 94 (6.00±1.97)  | 12 (6.00±2.09)  | 0.86            | 123 (6.42±1.94) | 48 (6.54±2.04)  | 8 (7.00±1.60)  | 0.45           | 114 (5.46±2.05) | 46 (5.43±1.73)  | 4 (4.00±1.41)  | 0.54           |         |     |     |   |  |  |
| <i>rs4954</i>     |                  |                   | 268 (5.95±2.04)   | 68 (6.01±1.91)  | 7 (6.29±2.50)   | 0.57            | 143 (6.39±1.94) | 30 (6.80±2.02)  | 6 (7.00±1.79)  | 0.23           | 125 (5.45±2.05) | 38 (5.39±1.59)  | 1 (2.00)       | 0.60           |         |     |     |   |  |  |
| CHRNA6            |                  | <i>rs9298628</i>  | <i>rs16891604</i> | 224 (5.94±2.06) | 106 (5.99±1.94) | 13 (6.31±2.06)  | 0.69            | 114 (6.39±1.98) | 56 (6.57±1.95) | 9 (7.11±1.54)  | 0.28            | 110 (5.48±2.06) | 50 (5.34±1.72) | 4 (4.50±2.08)  | 0.53    |     |     |   |  |  |
|                   |                  |                   | <i>rs16891604</i> | 203 (5.88±2.02) | 126 (6.10±2.06) | 13 (6.15±1.82)  | 0.35            | 102 (6.47±1.91) | 72 (6.46±2.07) | 5 (7.00±0.71)  | 0.82            | 101 (5.29±1.96) | 54 (5.63±1.97) | 8 (5.63±2.13)  | 0.31    |     |     |   |  |  |
|                   |                  |                   | <i>rs10109040</i> | 230 (5.93±2.05) | 99 (6.00±1.97)  | 14 (6.43±2.03)  | 0.53            | 118 (6.36±1.97) | 51 (6.63±1.97) | 10 (7.20±1.48) | 0.16            | 112 (5.48±2.04) | 48 (5.33±1.75) | 4 (4.50±2.08)  | 0.50    |     |     |   |  |  |
|                   |                  | <i>ht1</i>        | 67 (6.24±1.80)    | 153 (5.97±2.12) | 123 (5.83±2.01) | 0.25            | 40 (6.78±1.78)  | 78 (6.47±2.03)  | 61 (6.30±1.95) | 0.23           | 27 (5.44±1.55)  | 75 (5.44±2.10)  | 62 (5.37±1.97) | 0.72           |         |     |     |   |  |  |

C/C, C/R, and R/R represent major homozygotes, heterozygotes and minor homozygotes, respectively. Pa, Pb, and Pc mean the p-values of co-dominant, dominant and recessive model, respectively. P means p-value of codominant model, ND: nicotine dependence, CHRN: cholinergic nicotinic receptor, NDSS: Nicotine Dependence Syndrome Scale
