# Supplementary material for: Genetic Association of CHRNB3 and CHRNA6 Gene Polymorphisms with Nicotine Dependence Syndrome Scale in Korean Population
Source: PubMed Central journal article supplement — Psychiatry Investig. 2014 Jul 21;11(3):307–12. doi: 10.4306/pi.2014.11.3.307 (PMC4124190; doi:10.4306/pi.2014.11.3.307), 2014-07-21
Supplement: pi-11-307-s004.pdf [file pi-11-307-s004.pdf]

**Supplementary Table 4.** Association analysis of *CHRNA3* and *CHRNA6* polymorphisms with the nicotine dependence in Korean male subjects

| Gene          | Loci              | Allele             | NDS   | NS    | OR (95%CI)       | p    |
|---------------|-------------------|--------------------|-------|-------|------------------|------|
| <i>CHRNA3</i> | <i>rs13280604</i> | A>G                | 0.173 | 0.196 | 0.99 (0.36–2.75) | 0.98 |
|               | <i>rs16891561</i> | C>T                | 0.171 | 0.191 | 1.03 (0.36–2.97) | 0.96 |
|               | <i>rs4954</i>     | A>G                | 0.115 | 0.127 | 1.06 (0.29–3.84) | 0.93 |
| <i>CHRNA6</i> | <i>rs9298628</i>  | C>T                | 0.188 | 0.206 | 1.07 (0.37–3.12) | 0.91 |
|               | <i>rs16891604</i> | C>A                | 0.219 | 0.211 | 1.12 (0.45–2.79) | 0.81 |
|               | <i>rs10109040</i> | C>G                | 0.180 | 0.186 | 0.87 (0.29–2.68) | 0.81 |
|               | <i>ht1</i>        | $\Delta ht1 > ht1$ | 0.588 | 0.574 | 0.92 (0.41–2.07) | 0.84 |

OR and corresponding p-value were calculated by using logistic models whilst controlling by age and sex. NDS: nicotine dependent smoker, NS: non-smoker of population control, CHRN: cholinergic nicotinic receptor, OR: odds ratio
