# Supplementary material for: Genetic Association of CHRNB3 and CHRNA6 Gene Polymorphisms with Nicotine Dependence Syndrome Scale in Korean Population
Source: PubMed Central journal article supplement — Psychiatry Investig. 2014 Jul 21;11(3):307–12. doi: 10.4306/pi.2014.11.3.307 (PMC4124190; doi:10.4306/pi.2014.11.3.307), 2014-07-21
Supplement: pi-11-307-s005.pdf [file pi-11-307-s005.pdf]

**Supplementary Table 5.** Comparison of MAF among various ethnic groups

| Gene          | Loci              | Allele | Korean | Asian | CEU   | YRI   |
|---------------|-------------------|--------|--------|-------|-------|-------|
| <i>CHRNA3</i> | <i>rs13280604</i> | A>G    | 0.186  | 0.188 | 0.241 | 0.881 |
|               | <i>rs16891561</i> | C>T    | 0.183  | 0.196 | 0.253 | 0.892 |
|               | <i>rs4954</i>     | A>G    | 0.124  | 0.132 | 0.029 | 0.324 |
| <i>CNRNA6</i> | <i>rs9298628</i>  | C>T    | 0.203  | 0.212 | 0.235 | 0.852 |
|               | <i>rs16891604</i> | C>A    | 0.203  | 0.142 | 0.047 | 0.011 |
|               | <i>rs10109040</i> | C>G    | 0.193  | 0.196 | 0.224 | 0.898 |

MAF: minor allele frequency, CHRN: cholinergic nicotinic receptor, CEU: European, YRI: Yoruba African
