# Supplementary material for: Genetic Association of CHRNB3 and CHRNA6 Gene Polymorphisms with Nicotine Dependence Syndrome Scale in Korean Population
Source: PubMed Central journal article supplement — Psychiatry Investig. 2014 Jul 21;11(3):307–12. doi: 10.4306/pi.2014.11.3.307 (PMC4124190; doi:10.4306/pi.2014.11.3.307), 2014-07-21
Supplement: pi-11-307-s006.pdf [file pi-11-307-s006.pdf]

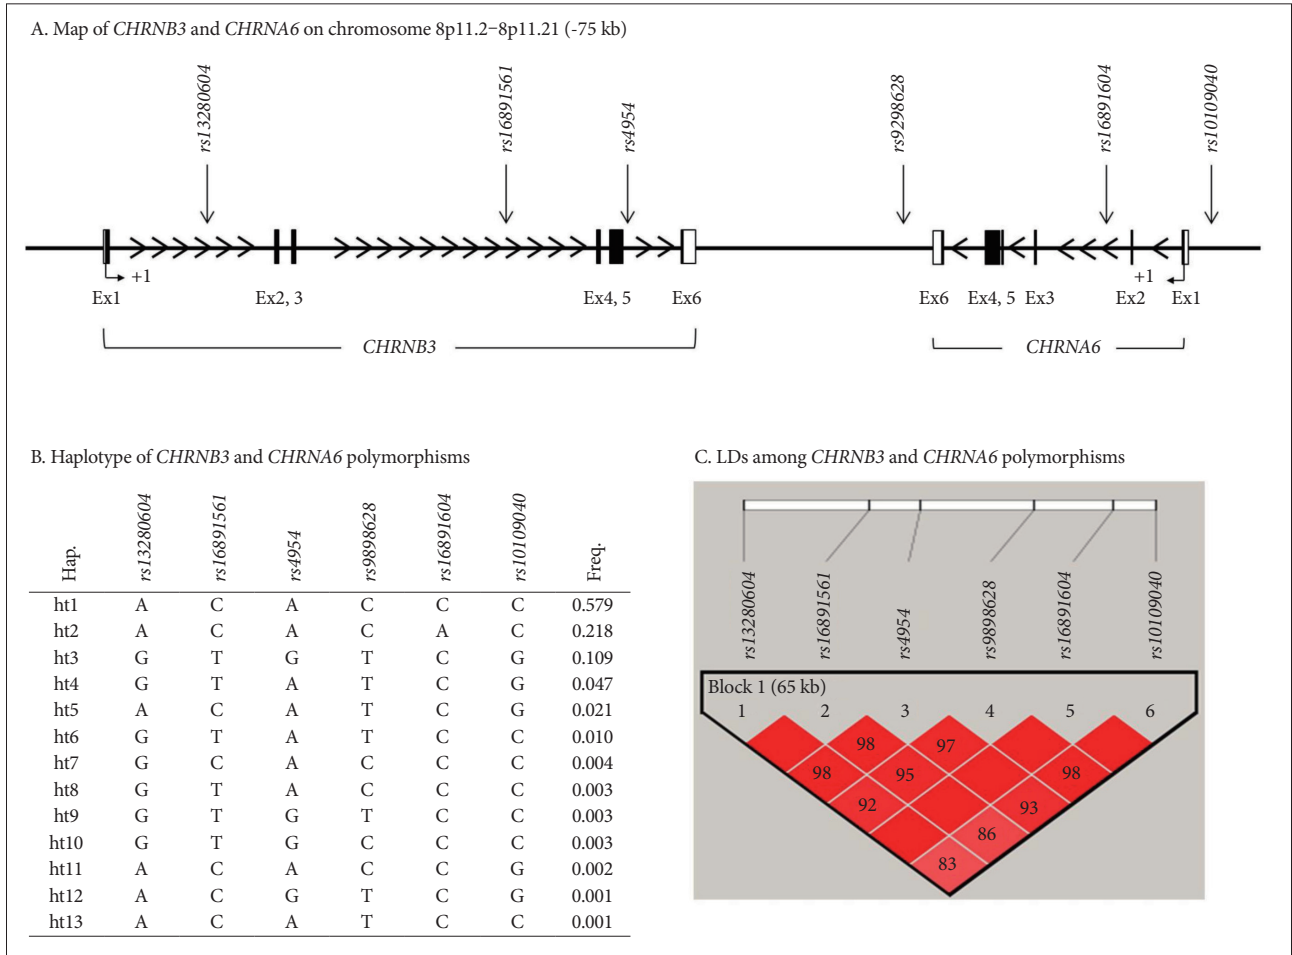

**Supplementary Figure 1.** Physical map of *CHRNA6-CHRNA6* gene region. A: Gene map and SNPs in *CHRNA6* and *CHRNA6* on chromosome 8p11.2-21. Coding exons are marked by black blocks, and 5' and 3' UTRs by white blocks. B: Haplotypes of *CHRNA6* and *CHRNA6*. Haplotypes with frequency >0.05 are used for further analysis. C: Linkage disequilibrium coefficient among *CHRNA6* and *CHRNA6* SNPs. CHRN: cholinergic nicotinic receptor, LD: linkage disequilibrium.
