# Supplementary material for: Genetic Association of CHRNB3 and CHRNA6 Gene Polymorphisms with Nicotine Dependence Syndrome Scale in Korean Population
Source: PubMed Central journal article supplement — Psychiatry Investig. 2014 Jul 21;11(3):307–12. doi: 10.4306/pi.2014.11.3.307 (PMC4124190; doi:10.4306/pi.2014.11.3.307), 2014-07-21
Supplement: pi-11-307-s007.pdf [file pi-11-307-s007.pdf]

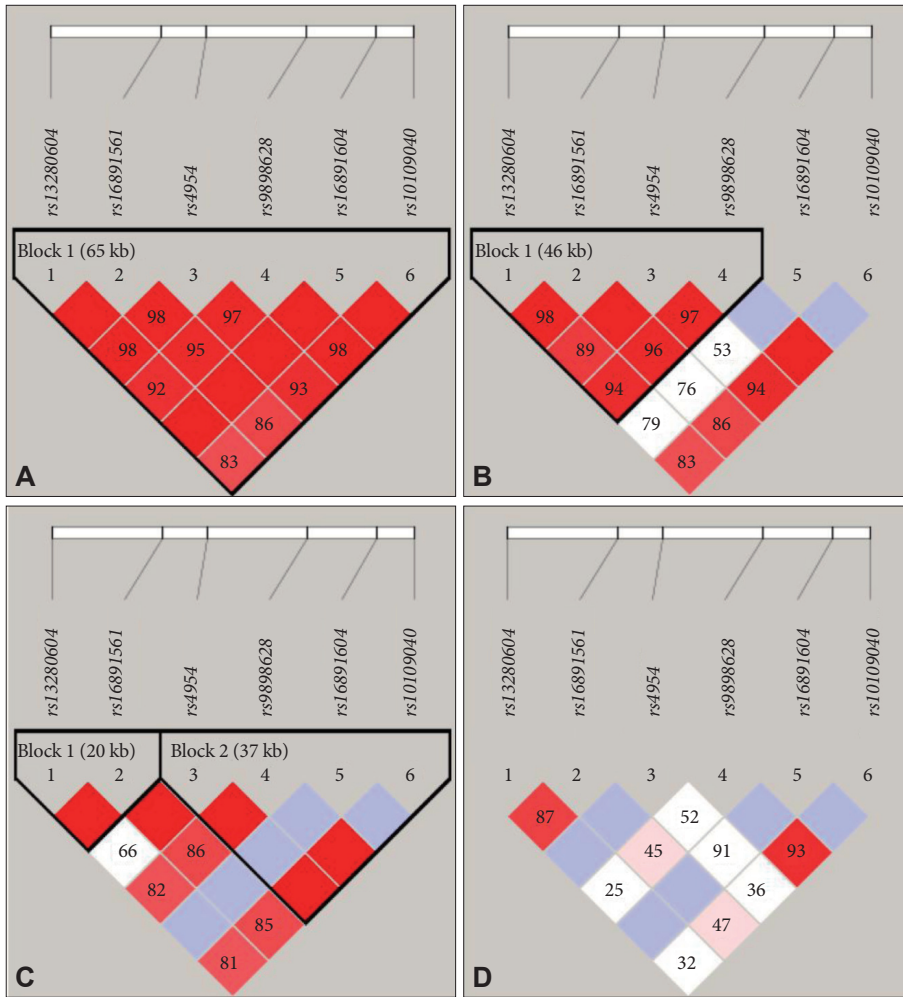

**Supplementary Figure 2.** Diagram of LD structures of Korean (A), Asian (Japanese+Chinese; B), Caucasian (C) and African (D) from 1000 genome database. LD: linkage disequilibrium.
